# Supplementary material for: Serological assessment of neutrophil elastase activity on elastin during lung ECM remodeling
Source: Springer Nature journal article supplement (doi:10.1186/s12890-015-0048-5), 2015-05-02

## **Additional File 1**

### **Serological Assessment of Neutrophil Elastase Activity during Lung ECM**

#### **Remodeling**

£12 Jacob H. Kristensen, <sup>1</sup>Morten A. Karsdal, <sup>1</sup>Jannie M.B. Sand, <sup>1</sup>Nicholas Willumsen, Claudia Diefenbach<sup>3</sup>,  
Birte Svensson, Per Hägglund, <sup>1</sup>Diana J. Oersnes-Leeming

£ Corresponding author: Jacob H. Kristensen [jhk@nordicbioscience.com](mailto:jhk@nordicbioscience.com)

<sup>1</sup>Nordic Bioscience A/S, Herlev, Denmark

<sup>2</sup>The Technical University of Denmark, Department of Systems Biology, Denmark

<sup>3</sup>Boehringer-Ingelheim Pharma GmbH, Biberach, Germany

## **Contents**

**Appendix 1: EL-NE-B Methods**

**Appendix 2 EL-NE-B Data**

**Figure S1: Characterization and specificity of the EL-NE-B monoclonal antibody**

**Figure S2: The EL-NE-B Assay in IPF**

## **Appendix 1**

### **EL-NE-B Methods**

### **Immunization procedure**

The immunization procedure for EL-NE-B followed the same procedures as EL-NE with the exception of the Freund's incomplete adjuvant (KLH-CGG-VGAGVPGLGV) which was acquired from Chinese Peptide Company (Beijing, China)

### **Characterization of clones**

The characterization of the EL-NE-B clones was performed similarly to the characterization of the EL-NE clones with the exception of the biotinylated peptide (Biotin-KK- VGAGVPGLGV), the free peptide (VGAGVPGLGV) and the elongated peptide (VGAGVPGLGVG). All used peptides were produced by Chinese Peptide Company (Beijing, China).

### **EL-NE-B Assay protocol**

The EL-NE-B assay protocol followed the EL-NE protocol with the exception of the above-mentioned peptides.

### **Clinical validation of EL-NE-B**

Levels of NE-degraded elastin were determined with the EL-NE-B assay in serum from IPF patients. The diagnosed samples and controls were identical to those investigated with the EL-NE assay in the main manuscript. Additional patient demographics and clinical information is presented in table S1 (See Additional file 2, Appendix 1).

### **Statistical analyses**

The geometric means (95% CI) of the NE-degraded elastin fragments quantified by the EL-NE-B assay, in diagnosed patients, were compared with their respective controls using the two-sided non-parametric Mann Whitney test. All statistical analysis was performed in MedCalc from MedCalc Software (Ostend, Belgium). Results were considered statistically significant if  $p < 0.05$ .

## **Appendix 2**

### **EL-NE-B Data**

**Reactivity and specificity of EL-NE-B**

The inhibition of EL-NE-B, in a competitive ELISA assay, with the free and elongated peptide is presented in Figure S1A. The EL-NE-B antibody was inhibited by the free peptide by 77% but not by the elongated peptide (0%).

EL-NE-B levels were assessed in the *in vitro* cleavage of human elastin with MMP-2, -7,-9, NE and non-cleaved elastin as well as NE alone (Figure S1B). EL-NE-B levels in elastin cleaved with NE were over 1700% higher than EL-NE-B levels in the remaining material.

**Clinical relevance of EL-NE-B**

There was no significant difference in EL-NE-B levels in serum from IPF patients and healthy controls (Figure S2).

**Figure S1: Characterization and specificity of the EL-NE-B monoclonal antibody.** (A): Competitive ELISA showing inhibition of free peptide (VGAGVPGLGV) and elongated peptide (VGAGVPGLGVG). (B): EL-NE-B levels after in vitro cleavage of intact human elastin and elastin cleaved with MMP-2, MMP-7, MMP-9 and NE. The EL-NE-B level in NE separately is also shown. Abbreviations: ELN, elastin; NE, Neutrophil elastase; MMP, metalloproteinase

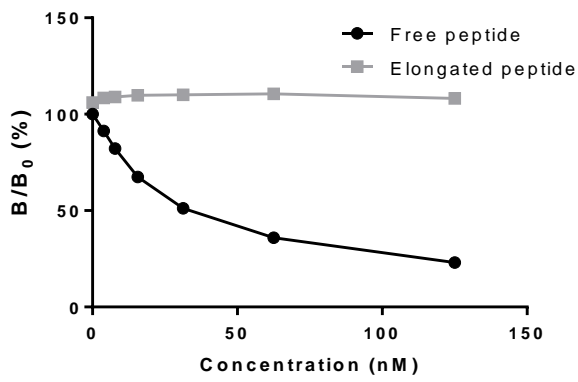

**A**

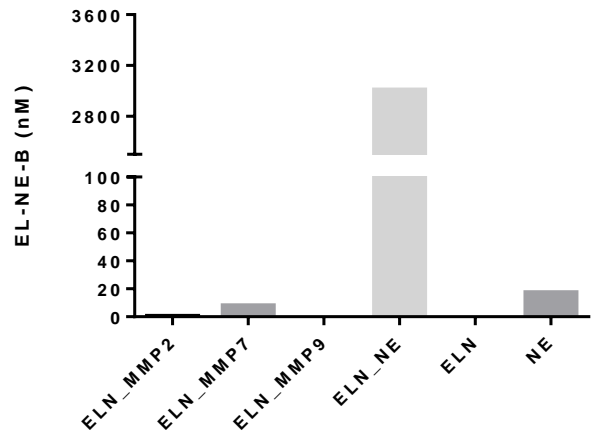

**B**

**Figure S2: The EL-NE-B Assay in IPF.** EL-NE-B levels in serum from patients with IPF (n=10) compared to controls (n=9). Groups were compared by T-test with Welch correction. Data is shown as the geometric mean (95 % CI). Abbreviations: IPF, idiopathic pulmonary fibrosis; ns, non-significant.

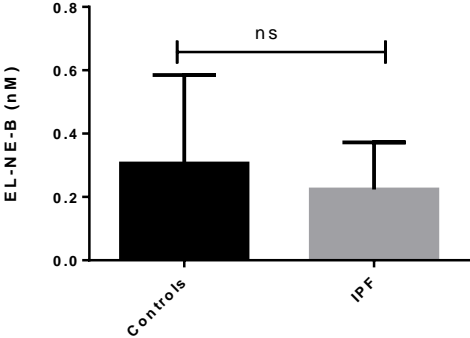

Supplement: MOESM2 [file 9751802]
