# Supplementary material for: Serological assessment of neutrophil elastase activity on elastin during lung ECM remodeling
Source: Springer Nature journal article supplement (doi:10.1186/s12890-015-0048-5), 2015-05-02
Supplement: MOESM1 [file 9751802]

## **Additional File 2**

### **Serological Assessment of Neutrophil Elastase Activity during Lung ECM Remodeling**

<sup>£12</sup>Jacob H. Kristensen, <sup>1</sup>Morten A. Karsdal, <sup>1</sup>Jannie M.B. Sand, <sup>1</sup>Nicholas Willumsen, Claudia Diefenbach<sup>3</sup>, Birte Svensson, Per Hägglund, <sup>1</sup>Diana J. Oersnes-Leeming

<sup>£</sup>Corresponding author: Jacob H. Kristensen [jhk@nordicbioscience.com](mailto:jhk@nordicbioscience.com)

<sup>1</sup>Nordic Bioscience A/S, Herlev, Denmark

<sup>2</sup>The Technical University of Denmark, Department of Systems Biology, Denmark

<sup>3</sup>Boehringer-Ingelheim Pharma GmbH, Biberach, Germany

## **Contents**

### **Appendix 1:**

**Table S1: Patient Demographics and Clinical Profiles of Cancer and IPF Patients**

## **Appendix 1**

.

| Group                          | n  | Gender, % females | Tumor stage (n) |    |     |    | Smoking status |      |         | Age, mean $\pm$ SD (range) |
|--------------------------------|----|-------------------|-----------------|----|-----|----|----------------|------|---------|----------------------------|
|                                |    |                   | I               | II | III | IV | never          | ever | unknown |                            |
| Lung cancer, all               | 40 | 25%               | 13              | 12 | 12  | 3  | 3              | 35   | 2       | 59 $\pm$ 10 (46-82)        |
| SCLC                           | 8  | 25%               | 2               | 1  | 4   | 1  | -              | 7    | 1       | 61 $\pm$ 12 (46-82)        |
| NSCLC                          | 32 | 25%               | 11              | 11 | 8   | 2  | 3              | 28   | 1       | 60 $\pm$ 9 (46-80)         |
| <i>Adenocarcinoma</i>          | 16 | 37.50%            | 4               | 6  | 6   | -  | -              | 15   | 1       | 57 $\pm$ 10 (46-80)        |
| <i>Squamous cell carcinoma</i> | 16 | 12.50%            | 7               | 5  | 2   | 2  | 3              | 13   | -       | 63 $\pm$ 6 (53-73)         |
| IPF (FEV 63-68 %)              | 10 | 20%               | -               | -  | -   | -  | 9              | 1    | -       | 74 $\pm$ 5 (67-83)         |

Table S1: Patient Demographics and Clinical Profiles of Cancer and IPF Patients. Abbreviations: FEV, forced expiratory volume; IPF, idiopathic pulmonary fibrosis; NSCLC, non-small-cell lung carcinoma; SCLC, small cell lung carcinoma.
